# Supplementary material for: High-Level Production of scFv-Fc Antibody Using an Artificial Promoter System with Transcriptional Positive Feedback Loop of Transactivator in CHO Cells
Source: MDPI journal article supplement (doi:10.3390/cells12222638), 2023-11-16
Supplement: s1 [file s1]

## Supplementary Materials

# High-Level Production of scFv-Fc Antibody Using an Artificial Promoter System with Transcriptional Positive Feedback Loop of Transactivator in CHO Cells

**Binbin Ying, Yoshinori Kawabe, Feiyang Zheng, Yuki Amamoto and Masamichi Kamihira\***

Department of Chemical Engineering, Faculty of Engineering, Kyushu University, 744 Motooka, Nishi-ku Fukuoka 819-0395, Japan;  
ying.binbin.538@s.kyushu-u.ac.jp (B.Y.); kawabe@chem-eng.kyushu-u.ac.jp (Y.K.); zfylyhzw@gmail.com (F.Y.);  
amamoto.yuki.518@m.kyushu-u.ac.jp (Y.A.)

\* Correspondence: kamihira@chem-eng.kyushu-u.ac.jp; Tel.: +81 92 802 2743

## Supplementary Figure Legends

**Figure S1.** Flow cytometry analysis of GFP expression in CHO/aTF\_GFP cells. (a) During cultivation at normal temperature (37°C) (turned “on” state). (b) After 8 days of Dox treatment. (c) After transient transfection of pCMV/aTF plasmid into Dox-treated cells.

**Figure S2.** Average values of scFv-Fc, glucose, and lactate in the culture supernatant obtained from semi-continuous culture of CHO/aTF\_scFv-Fc2 cells. (a) scFv-Fc concentration. (b) scFv-Fc-specific production rate. (c) Glucose concentration. (d) Lactate concentration.

**Figure S3.** Scatter plots from DNA microarray analysis of CHO/aTF\_scFv-Fc2 cells in semi-continuous culture. (a) Global gene expression signal values between each seeding cell density condition. (b) Signal values for genes that were upregulated with Z-scores of 5 or higher during low-temperature culture under all seeding cell density conditions.

**Figure S4.** Genes obtained from characteristic functional clustering analysis in DNA microarray analysis of CHO/aTF\_scFv-Fc2 cells in semi-continuous culture. List of upregulated genes with the most significant differences in “Biological process” and “Cellular component.”

**a**

Turn “on” state  
in CHO/aTF\_GFP

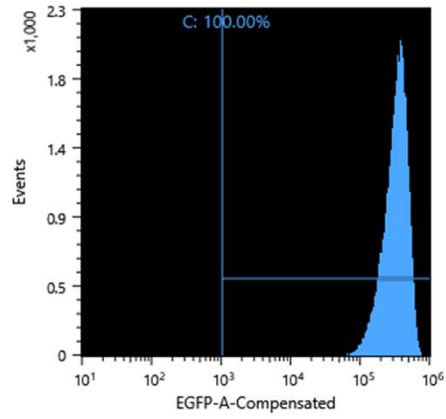

**b**

Turn “off”  
by Dox addition

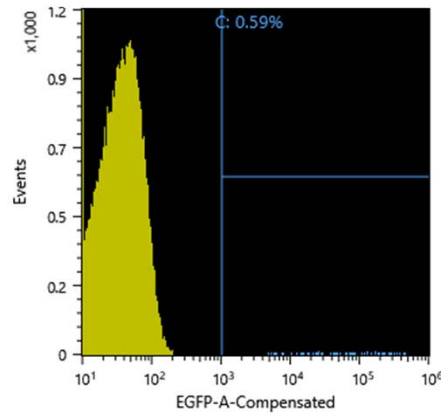

**c**

Turn “on” again by  
transient transfection  
of pCMV/aTF

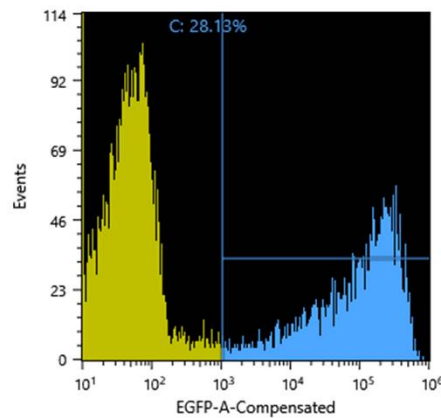

**Figure S1.** Flow cytometry analysis of GFP expression in CHO/aTF\_GFP cells. (a) During cultivation at normal temperature (37°C) (turned “on” state). (b) After 8 days of Dox treatment. (c) After transient transfection of pCMV/aTF plasmid into Dox-treated cells.

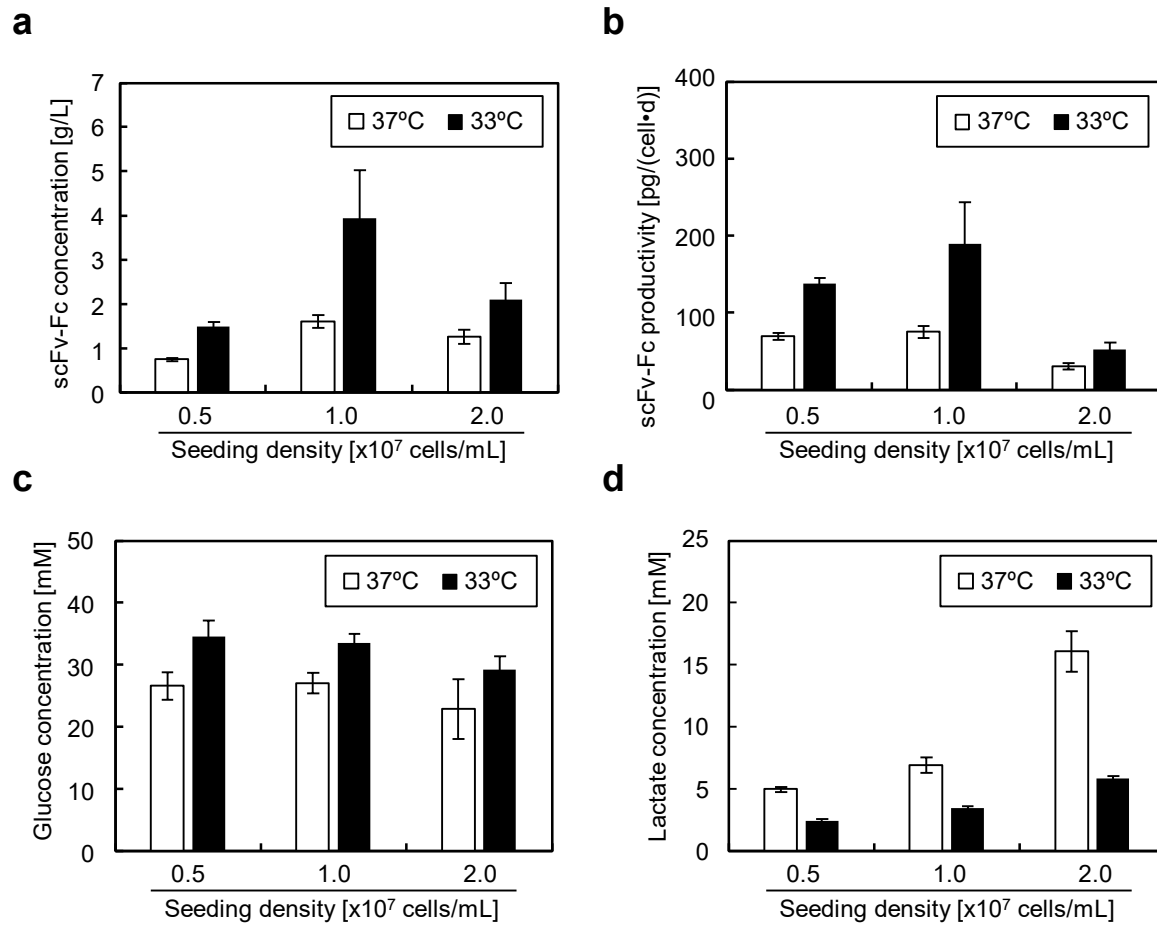

**Figure S2.** Average values of scFv-Fc, glucose, and lactate in the culture supernatant obtained from semi-continuous culture of CHO/aTF\_scFv-Fc2 cells. (a) scFv-Fc concentration. (b) scFv-Fc-specific production rate. (c) Glucose concentration. (d) Lactate concentration.



**a**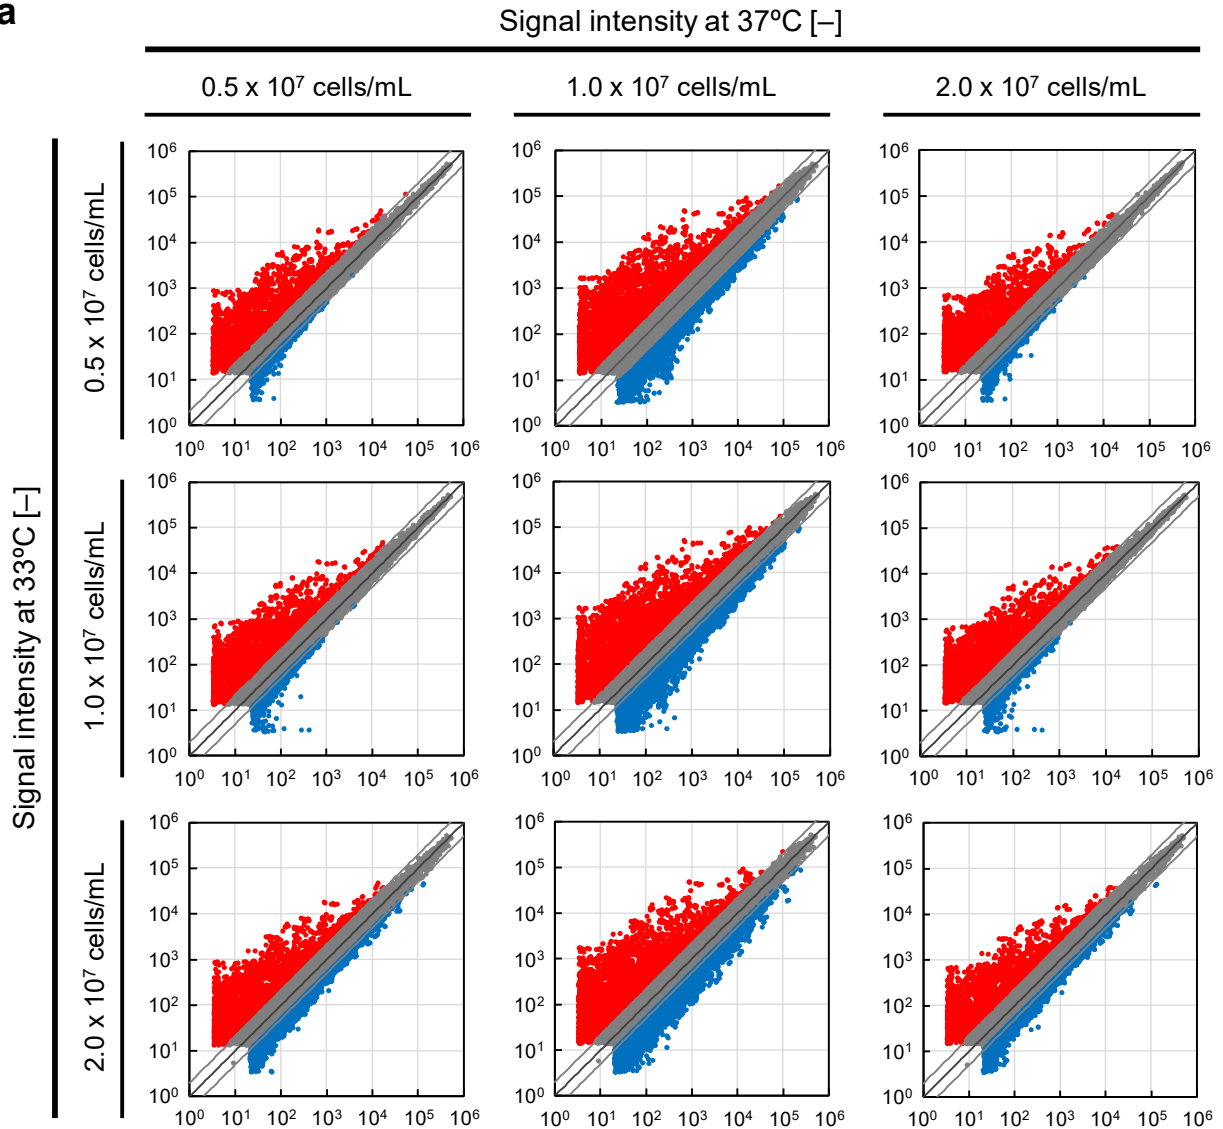**b**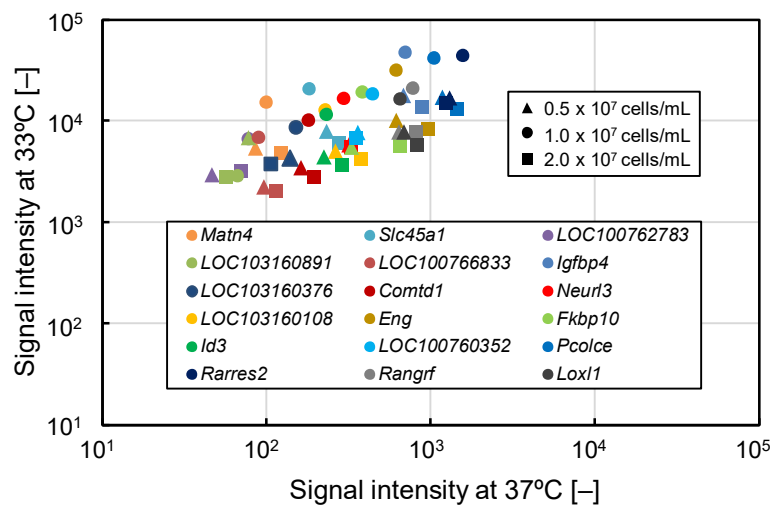

**Figure S3.** Scatter plots from DNA microarray analysis of CHO/aTF\_scFv-Fc2 cells in semi-continuous culture. (a) Global gene expression signal values between each seeding cell density condition. (b) Signal values for genes that were upregulated with Z-scores of 5 or higher during low-temperature culture under all seeding cell density conditions.

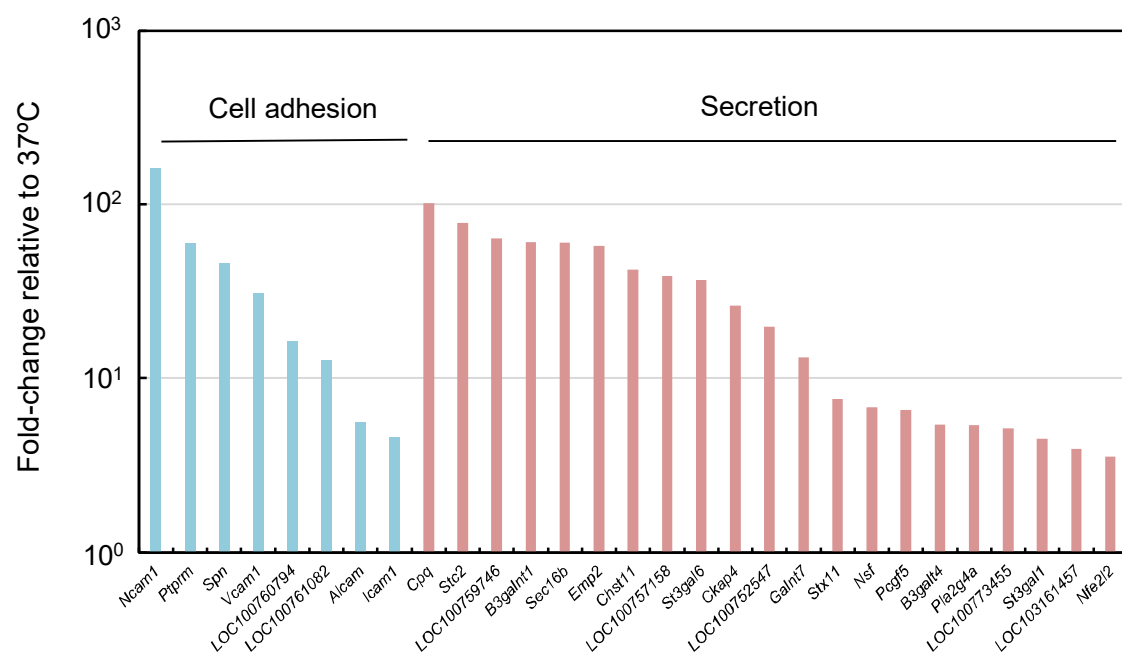

**Figure S4.** Genes obtained from characteristic functional clustering analysis in DNA microarray analysis of CHO/aTF\_scFv-Fc2 cells in semi-continuous culture. List of upregulated genes with the most significant differences in “Biological process” and “Cellular component.”

Table S1 Primer and probe lists for evaluation of transgene copy number by quantitative PCR

| Target               | Oligo type <sup>#</sup> | Sequence (5'→3')       |
|----------------------|-------------------------|------------------------|
| GFP                  | F                       | CGAGGACAGCGTGATCTTC    |
|                      | R                       | CCACGGTGGCGTTGCT       |
|                      | P                       | CCGACAAGATCATCC        |
| scFv-Fc <sup>§</sup> | F                       | AGTGCTGCACCAGGATTGG    |
|                      | R                       | CTTGTTGGACACCTTGCACTTG |
|                      | P                       | TGAACGGCAAAGAGT        |
| scFv-Fc              | F                       | TGGAGTGGGAGAGCAATGG    |
|                      | R                       | CGGGAGGCGTGGTCTTG      |
|                      | P                       | AGCCGGAGAACAAC         |

<sup>#</sup>F, Forward primer; R, Reverse primer; P, Taqman probe. The probes were labeled with FAM dye 5' end and minor groove binder as a quencher at 3' end.

<sup>§</sup>scFv-Fc gene in donor vector plasmid using Cre-RMCE was codon-optimized based on human codon usage.

Table S2. Up-regulated genes in low temperature culture at 33°C

| Gene symbol         | Gene description                                                       | Fold-change (Z-score)          |                                |                                |
|---------------------|------------------------------------------------------------------------|--------------------------------|--------------------------------|--------------------------------|
|                     |                                                                        | 0.5 x 10 <sup>7</sup> cells/mL | 1.0 x 10 <sup>7</sup> cells/mL | 2.0 x 10 <sup>7</sup> cells/mL |
| <i>Matn4</i>        | matrilin 4                                                             | 61.78<br>(9.73)                | 154.23<br>(6.45)               | 39.16<br>(7.64)                |
| <i>Slc45a1</i>      | solute carrier family 45, member 1                                     | 33.46<br>(8.29)                | 114.80<br>(8.47)               | 21.65<br>(6.41)                |
| <i>LOC100762783</i> | synaptonemal complex protein 3-like                                    | 45.42<br>(9.01)                | 86.76<br>(5.71)                | 61.83<br>(5.59)                |
| <i>LOC103160891</i> | synaptonemal complex protein 3-like                                    | 43.64<br>(5.22)                | 85.26<br>(5.69)                | 48.57<br>(5.27)                |
| <i>LOC100766833</i> | cytochrome b-245 light chain                                           | 22.81<br>(7.38)                | 77.54<br>(5.57)                | 17.41<br>(5.95)                |
| <i>Igfbp4</i>       | insulin-like growth factor binding protein 4                           | 25.50<br>(12.92)               | 68.03<br>(7.54)                | 15.45<br>(7.39)                |
| <i>LOC103160376</i> | late cornified envelope protein 1C-like                                | 31.22<br>(8.12)                | 57.14<br>(5.18)                | 35.44<br>(7.43)                |
| <i>Comtd1</i>       | catechol-O-methyltransferase domain containing 1                       | 20.78<br>(7.16)                | 57.04<br>(5.17)                | 14.29<br>(5.54)                |
| <i>Neurl3</i>       | neuralized E3 ubiquitin protein ligase 3                               | 17.89<br>(6.81)                | 56.84<br>(7.22)                | 16.67<br>(5.86)                |
| <i>LOC103160108</i> | multivesicular body subunit 12B                                        | 18.72<br>(6.92)                | 56.54<br>(5.16)                | 11.04<br>(5.01)                |
| <i>Eng</i>          | endoglin                                                               | 16.20<br>(11.11)               | 51.49<br>(7.04)                | 8.64<br>(5.82)                 |
| <i>Fkbp10</i>       | FK506 binding protein 10, 65 kDa                                       | 16.29<br>(6.59)                | 51.14<br>(7.03)                | 8.76<br>(5.86)                 |
| <i>Id3</i>          | inhibitor of DNA binding 3, dominant negative helix-loop-helix protein | 19.20<br>(6.98)                | 49.98<br>(5.01)                | 12.61<br>(5.28)                |
| <i>LOC100760352</i> | serpin B6                                                              | 20.79<br>(7.17)                | 42.12<br>(6.69)                | 19.25<br>(6.16)                |
| <i>Pcolce</i>       | procollagen C-endopeptidase enhancer                                   | 14.19<br>(10.58)               | 39.88<br>(6.59)                | 8.88<br>(5.90)                 |
| <i>Rarres2</i>      | retinoic acid receptor responder (tazarotene induced) 2                | 12.83<br>(10.18)               | 28.49<br>(7.18)                | 12.11<br>(6.74)                |
| <i>Rangrf</i>       | RAN guanine nucleotide release factor                                  | 11.99<br>(9.91)                | 27.22<br>(5.91)                | 9.44<br>(6.06)                 |
| <i>Loxl1</i>        | lysyl oxidase-like 1                                                   | 11.14<br>(9.62)                | 25.43<br>(5.79)                | 6.95<br>(5.24)                 |

Table S2
